# Supplementary material for: Novel Highly Sensitive Protein Sensors Based on Tapered Optical Fibres Modified with Au-Based Nanocoatings
Source: Hindawi journal article supplement (doi:10.1155/2016/8129387), 2016-01-01
Supplement: f1 [file 8129387.f1.docx]

# SUPPORTING ADDITIONAL INFORMATION

Novel highly sensitive protein sensors based on tapered optical fibres modified with Au-based nanocoatings

Aitor Urrutia1, Kartheka Bojan2, Leonel Marques2, Kevin Mullaney3, Javier Goicoechea1, Stephen James3, Matt Clark2, Ralph Tatam3 and Sergiy Korposh2*

*1 Nanostructured Optical Devices Laboratory, Electric and Electronic Engineering Department, Public University of Navarra, Campus Arrosadia, 31006 Pamplona, SPAIN*

2 *Advanced Optics Group, Faculty of Engineering, University of Nottingham, University Park, Nottingham NG7 2RD, United Kingdom*

*3Department of Engineering Photonics, School of Engineering, Cranfield University, Cranfield,*

*Bedfordshire MK43 0AL, United Kingdom*

## S.1.- OTHER FIGURES OF INTEREST REFERENCED IN THE TEXT

In this section other figures of interest, referenced in this paper are reported.


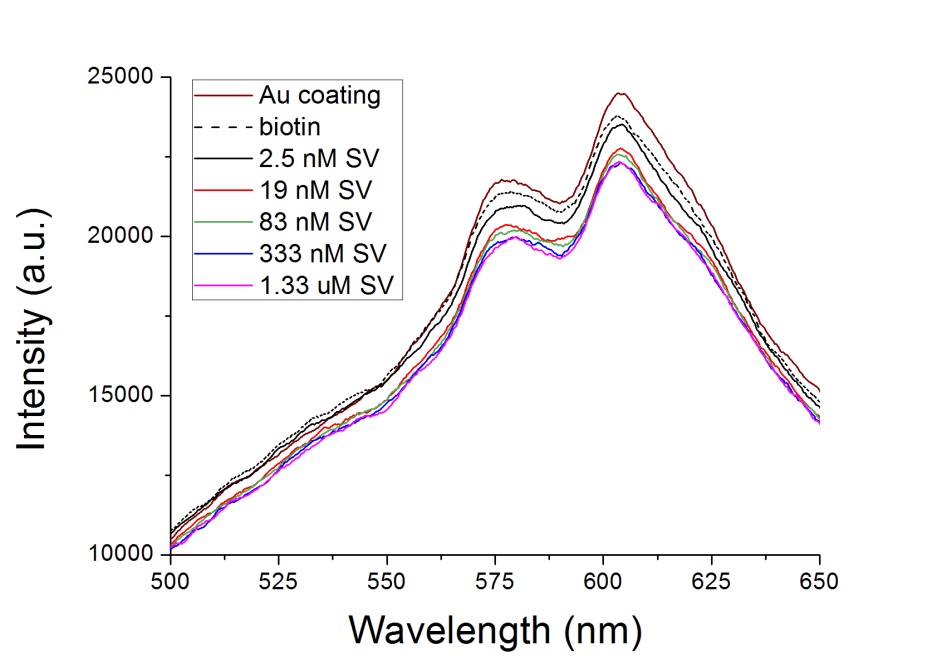


**Figure S1**: Spectra after Au coating, biotin adhesion, and further different SV immersions. Sputtered taper (T1 device)


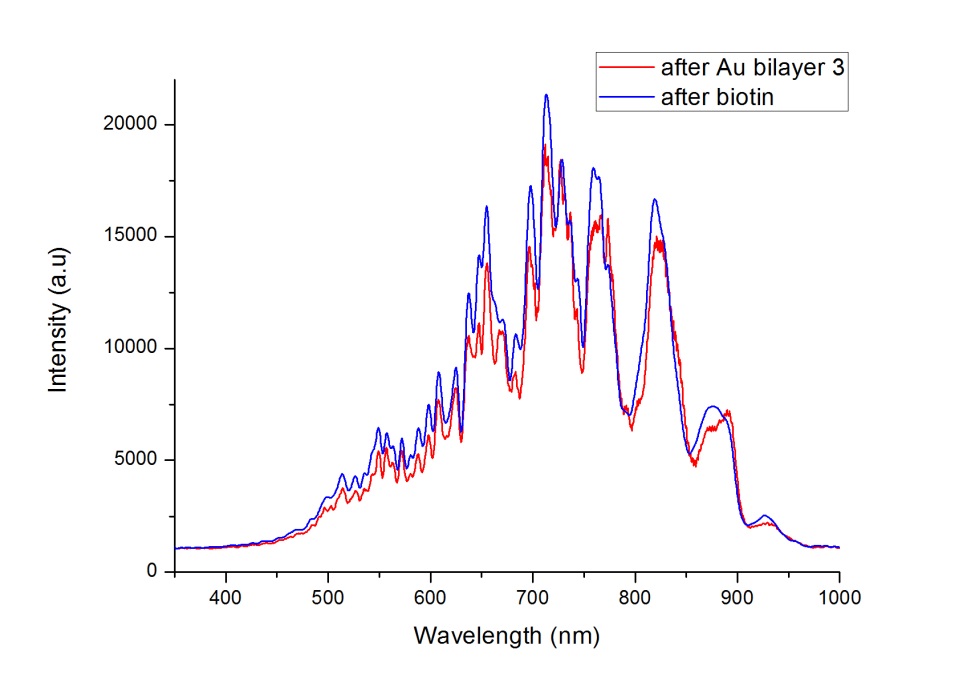


**Figure S2**: Transmission spectra after Au NPs deposition, and after biotin adhesion. LbL-coated taper (T2 device).


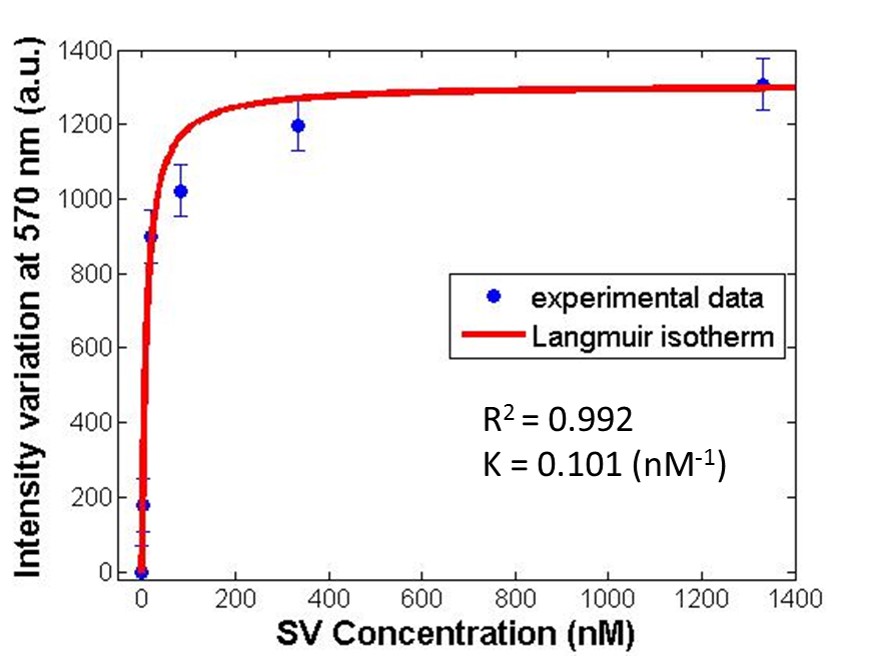


**Figure S3:** Langmuir isotherm plot from intensity values (T1 sensor). Fitting for binding constant calculation (biotin measurement- null SV concentration – included)


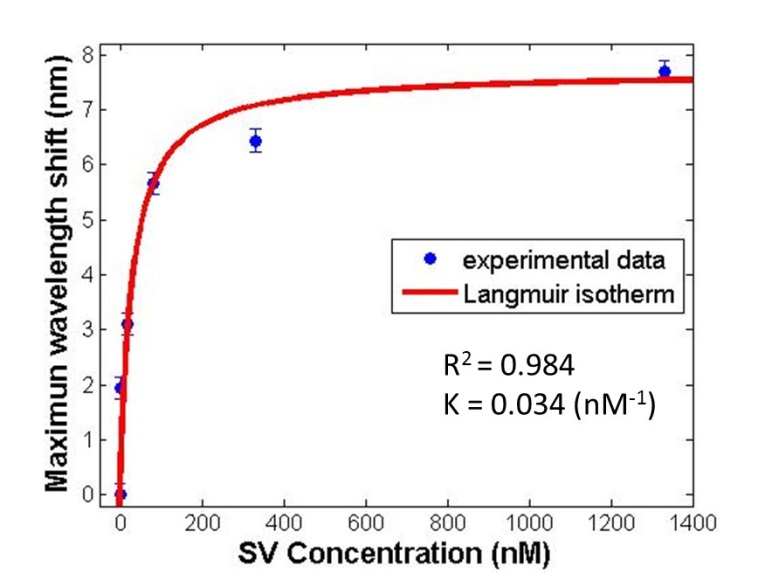


**Figure S4**: Langmuir isotherm plot from wavelength peak values (T2 sensor). Fitting for binding constant calculation (biotin measurement- null SV concentration – included).


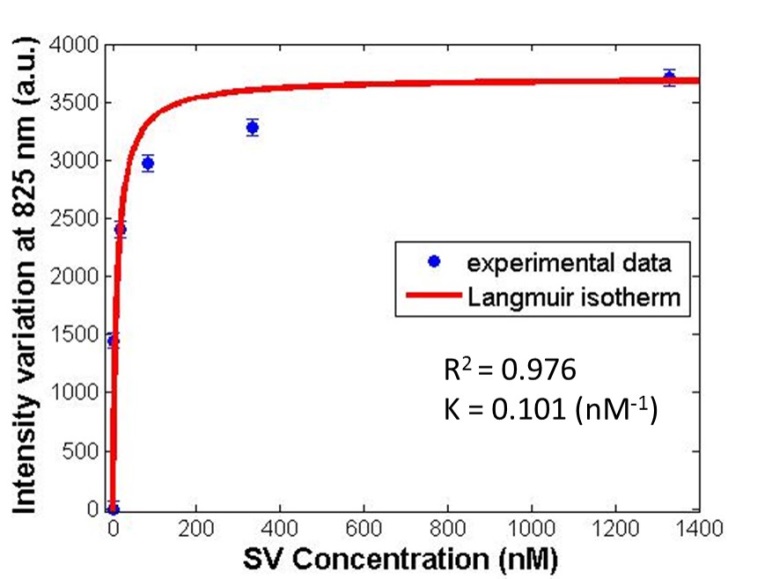


**Figure S5**: Langmuir isotherm plot from intensity peak values (T2 sensor). Fitting for binding constant calculation (biotin measurement- null SV concentration – included).

## S.2 .- LIMIT OF DETECTION CALCULATION (LoD)

The value of standard deviation obtained from three blank spectra measurements was 32.83 units in intensity. Therefore, using the equation:

LoD = 3·σ,

Where σ is standard deviation; the numeric value provided was 98.49 units. From this minimum value in intensity, LoD in SV concentration was obtained using the Langmuir plots.

For T1 and T2 devices the detail of Langmuir plots showing the LoD value in SV concentration is depicted in Figures S1 and S2 respectively.


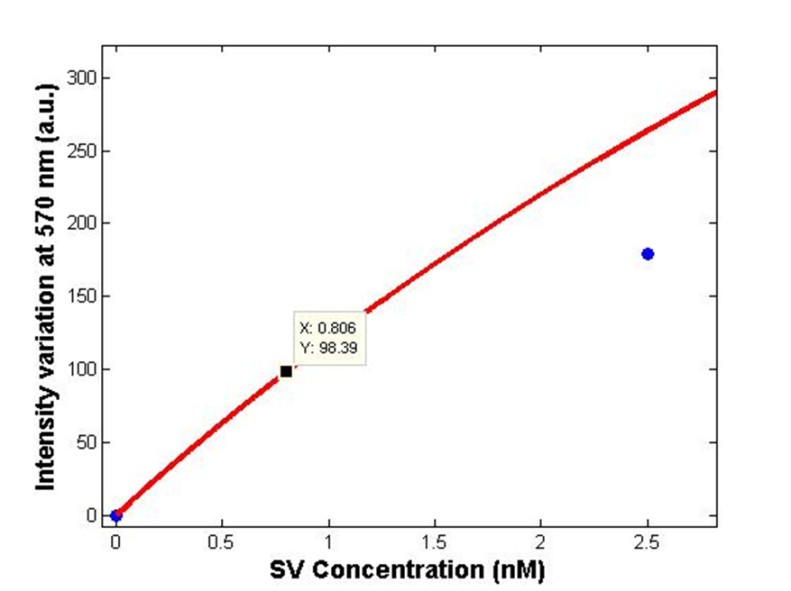


**Figure S6:** LoD calculation graph from Langmuir isotherm plot for T1 sensor.


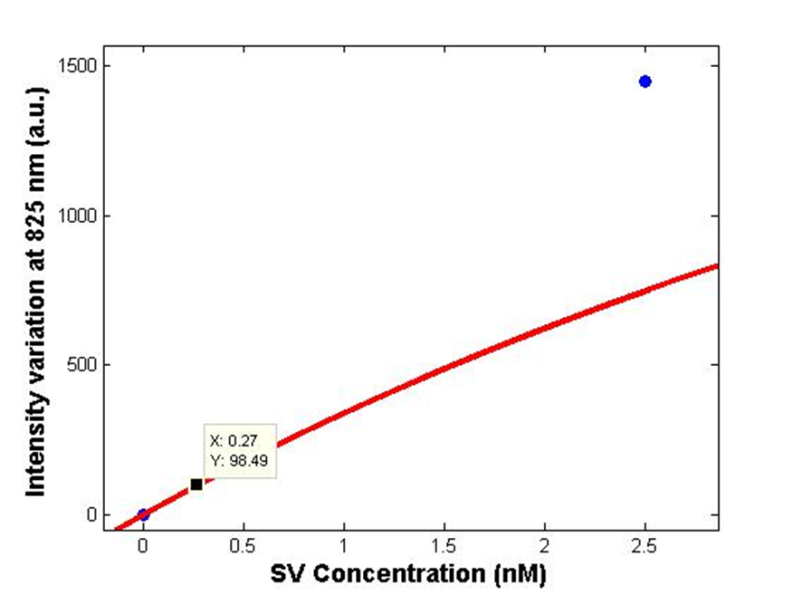


**Figure S7:** LoD calculation graph from Langmuir isotherm plot for T2 sensor.
